# Supplementary material for: Defective valves and abnormal mural cell recruitment underlie lymphatic vascular failure in lymphedema distichiasis
Source: Springer Nature journal article supplement (doi:10.1038/nm1094), 2004-08-22
Supplement: 41591_2004_BFnm1094_MOESM1_ESM.pdf [file 41591_2004_BFnm1094_MOESM1_ESM.pdf]

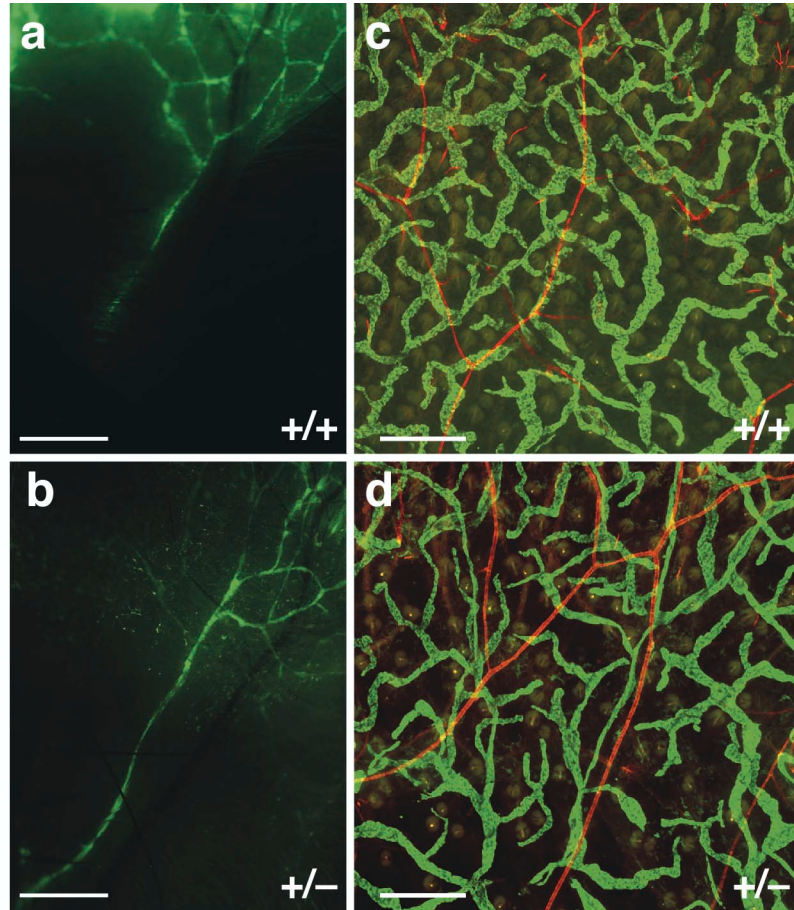

**Supplementary Figure 1. Analysis of lymphatic vasculature in adult *Foxc2*<sup>+/-</sup> mice.** (a,b) Normal lymphatic flow and lymphatic vascular patterning in the skin of *Foxc2* heterozygous adult mice ( $n=8$ ). Functioning lymphatic vessels were visualized after the injection of FITC-dextran. (c,d) Lymphatic vasculature of the ears was stained using antibodies against Lyve-1 (green). Large blood vessels (mainly arteries) were visualized using antibodies against SMA (red). Bar, 250  $\mu\text{m}$  (a,b) and 80  $\mu\text{m}$  (c,d).
