# Supplementary material for: Defective valves and abnormal mural cell recruitment underlie lymphatic vascular failure in lymphedema distichiasis
Source: Springer Nature journal article supplement (doi:10.1038/nm1094), 2004-08-22
Supplement: 41591_2004_BFnm1094_MOESM2_ESM.pdf [file 41591_2004_BFnm1094_MOESM2_ESM.pdf]

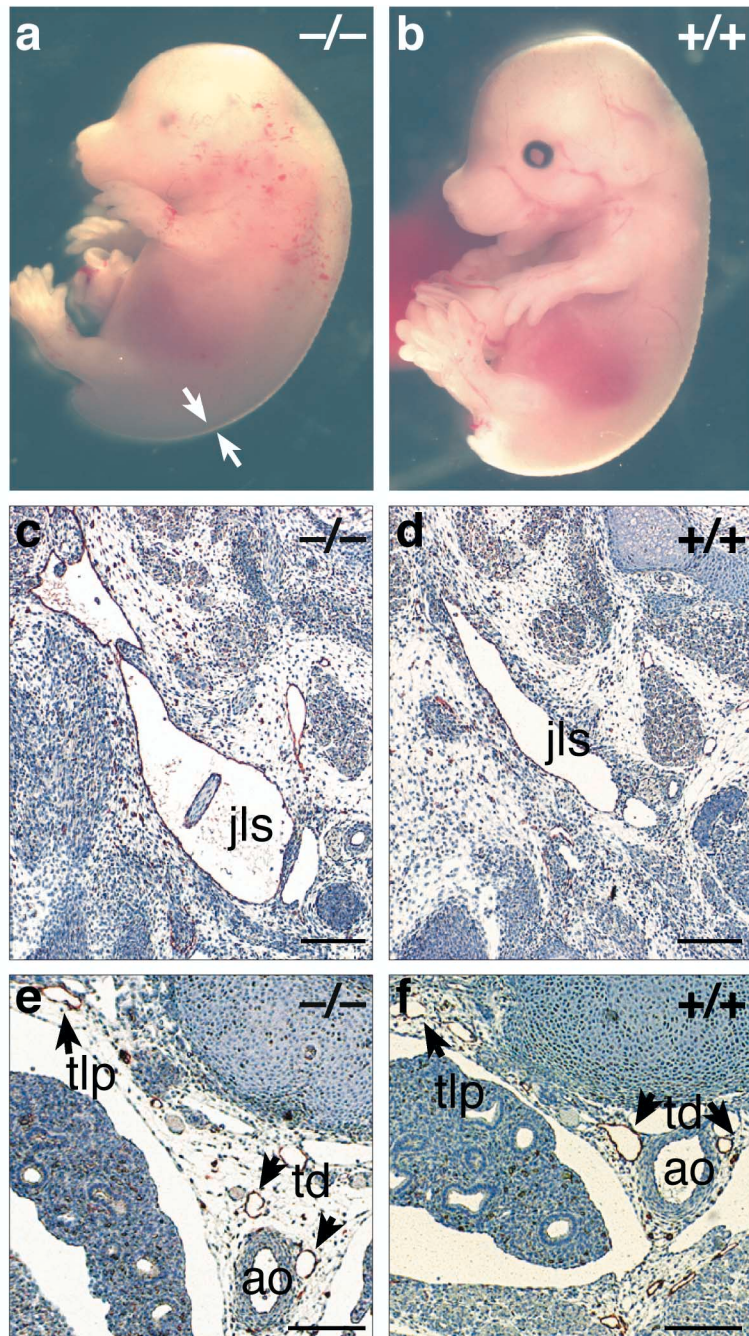

**Supplementary Figure 2. Normal early development of lymphatic vasculature in *Foxc2*<sup>-/-</sup> mice.** E14.5 *Foxc2*<sup>-/-</sup> but not the wt littermate control embryos display edema (a, b, arrows) while the overall development of the lymphatic vessels is not affected (c-f, arrows). Sections from E14.5 *Foxc2*<sup>-/-</sup> and littermate control embryos were stained with antibodies against lymphatic endothelial marker Lyve-1. ao-aorta, jls-jugular lymphatic sacs, td-thoracic duct, tlp-thoracic lymph plexus. Bar, 100  $\mu$ m.
