# Supplementary material for: Defective valves and abnormal mural cell recruitment underlie lymphatic vascular failure in lymphedema distichiasis
Source: Springer Nature journal article supplement (doi:10.1038/nm1094), 2004-08-22
Supplement: 41591_2004_BFnm1094_MOESM3_ESM.pdf [file 41591_2004_BFnm1094_MOESM3_ESM.pdf]

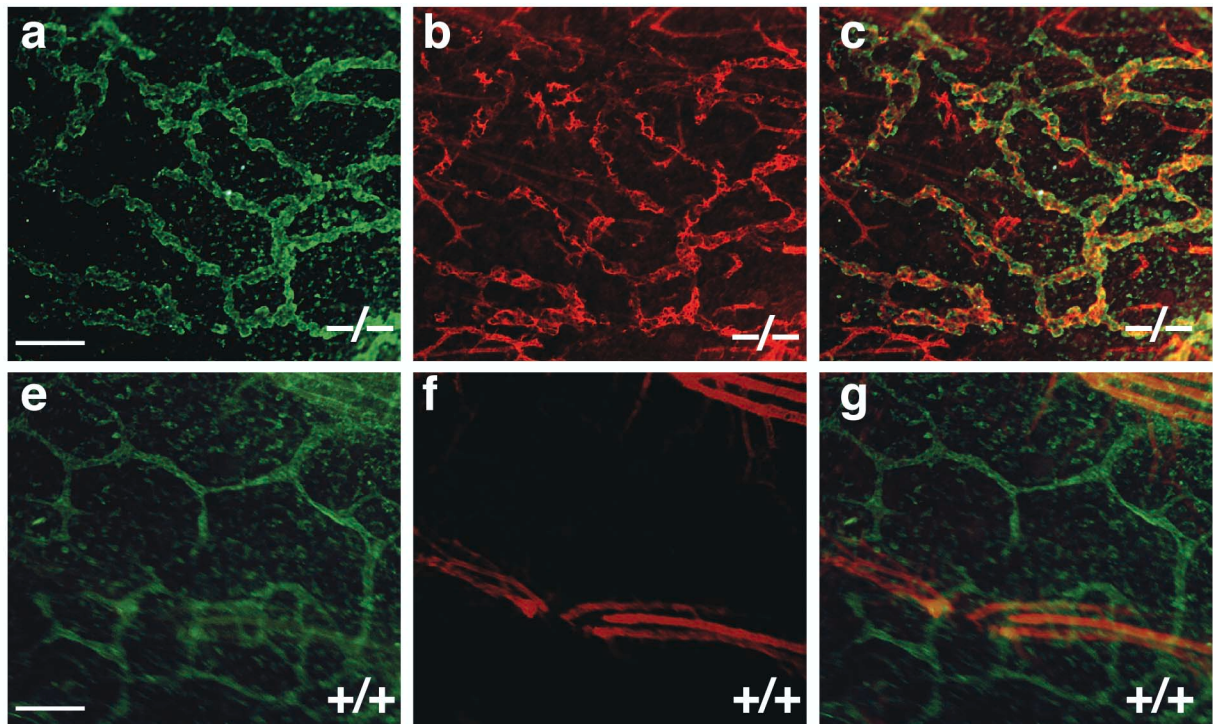

**Supplementary Figure 3. Abnormal lymphatic patterning and PC/SMC recruitment in the skin of *Foxc2*<sup>-/-</sup> embryos.** Whole mount staining of E17.5 skin for Lyve-1 (green) and SMA (red). Note that all lymphatic vessels in *Foxc2*<sup>-/-</sup> mice, but not in the wt mice contain
