# Supplementary material for: Defective valves and abnormal mural cell recruitment underlie lymphatic vascular failure in lymphedema distichiasis
Source: Springer Nature journal article supplement (doi:10.1038/nm1094), 2004-08-22
Supplement: 41591_2004_BFnm1094_MOESM4_ESM.pdf [file 41591_2004_BFnm1094_MOESM4_ESM.pdf]

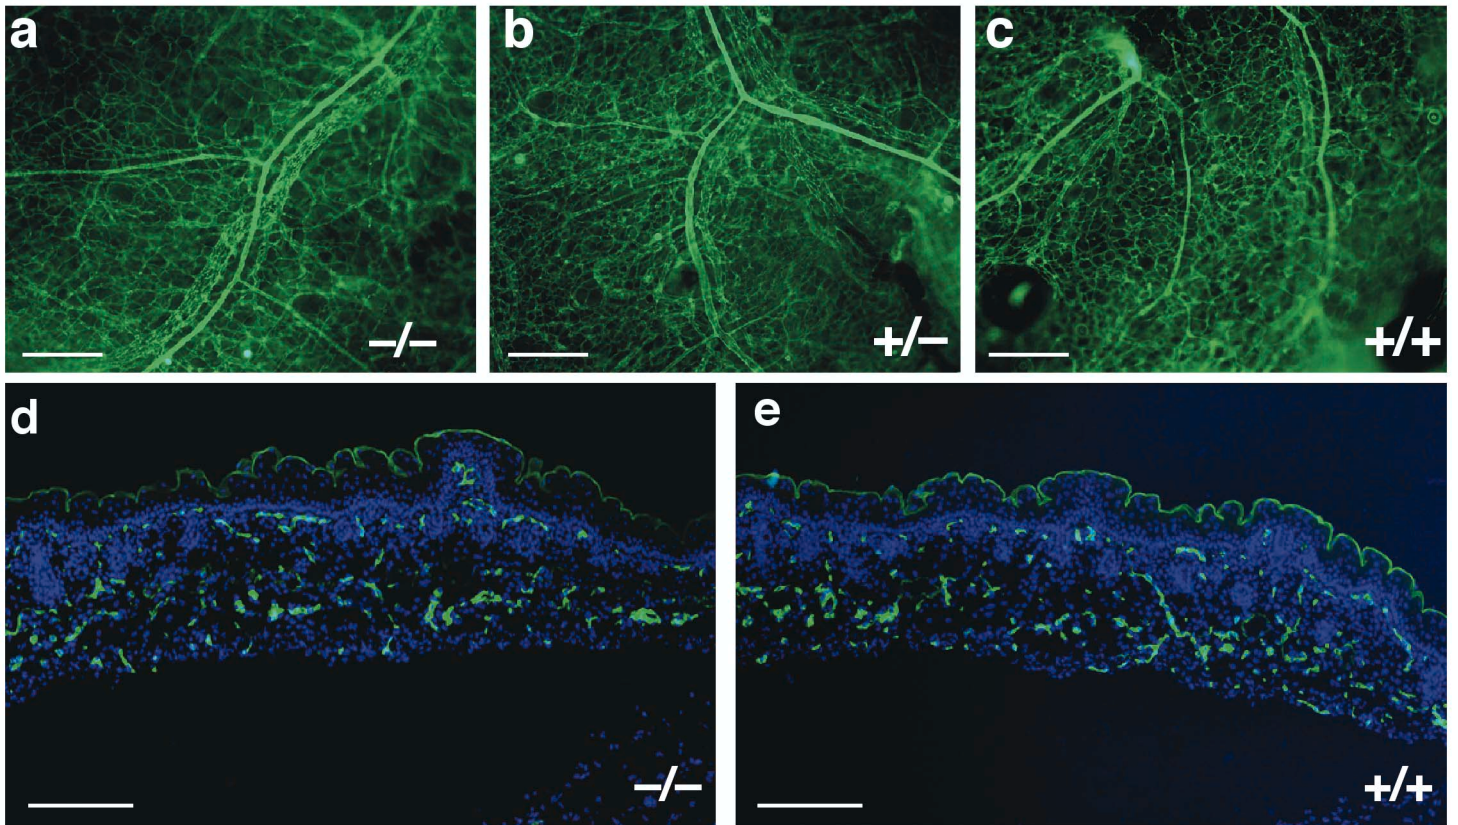

**Supplementary Figure 4. Skin blood vessel development is normal in *Foxc2*<sup>-/-</sup> mice. (a-e).** Whole mount images and sections of skin stained for Pecam-1 in *Foxc2*<sup>-/-</sup> (a,d), *Foxc2*<sup>+/-</sup> (b) and wt (c,e) E17.5 embryos. Nuclei are stained in blue in d,e. Bar, 250  $\mu$ m.
