# Supplementary material for: Defective valves and abnormal mural cell recruitment underlie lymphatic vascular failure in lymphedema distichiasis
Source: Springer Nature journal article supplement (doi:10.1038/nm1094), 2004-08-22
Supplement: 41591_2004_BFnm1094_MOESM5_ESM.pdf [file 41591_2004_BFnm1094_MOESM5_ESM.pdf]

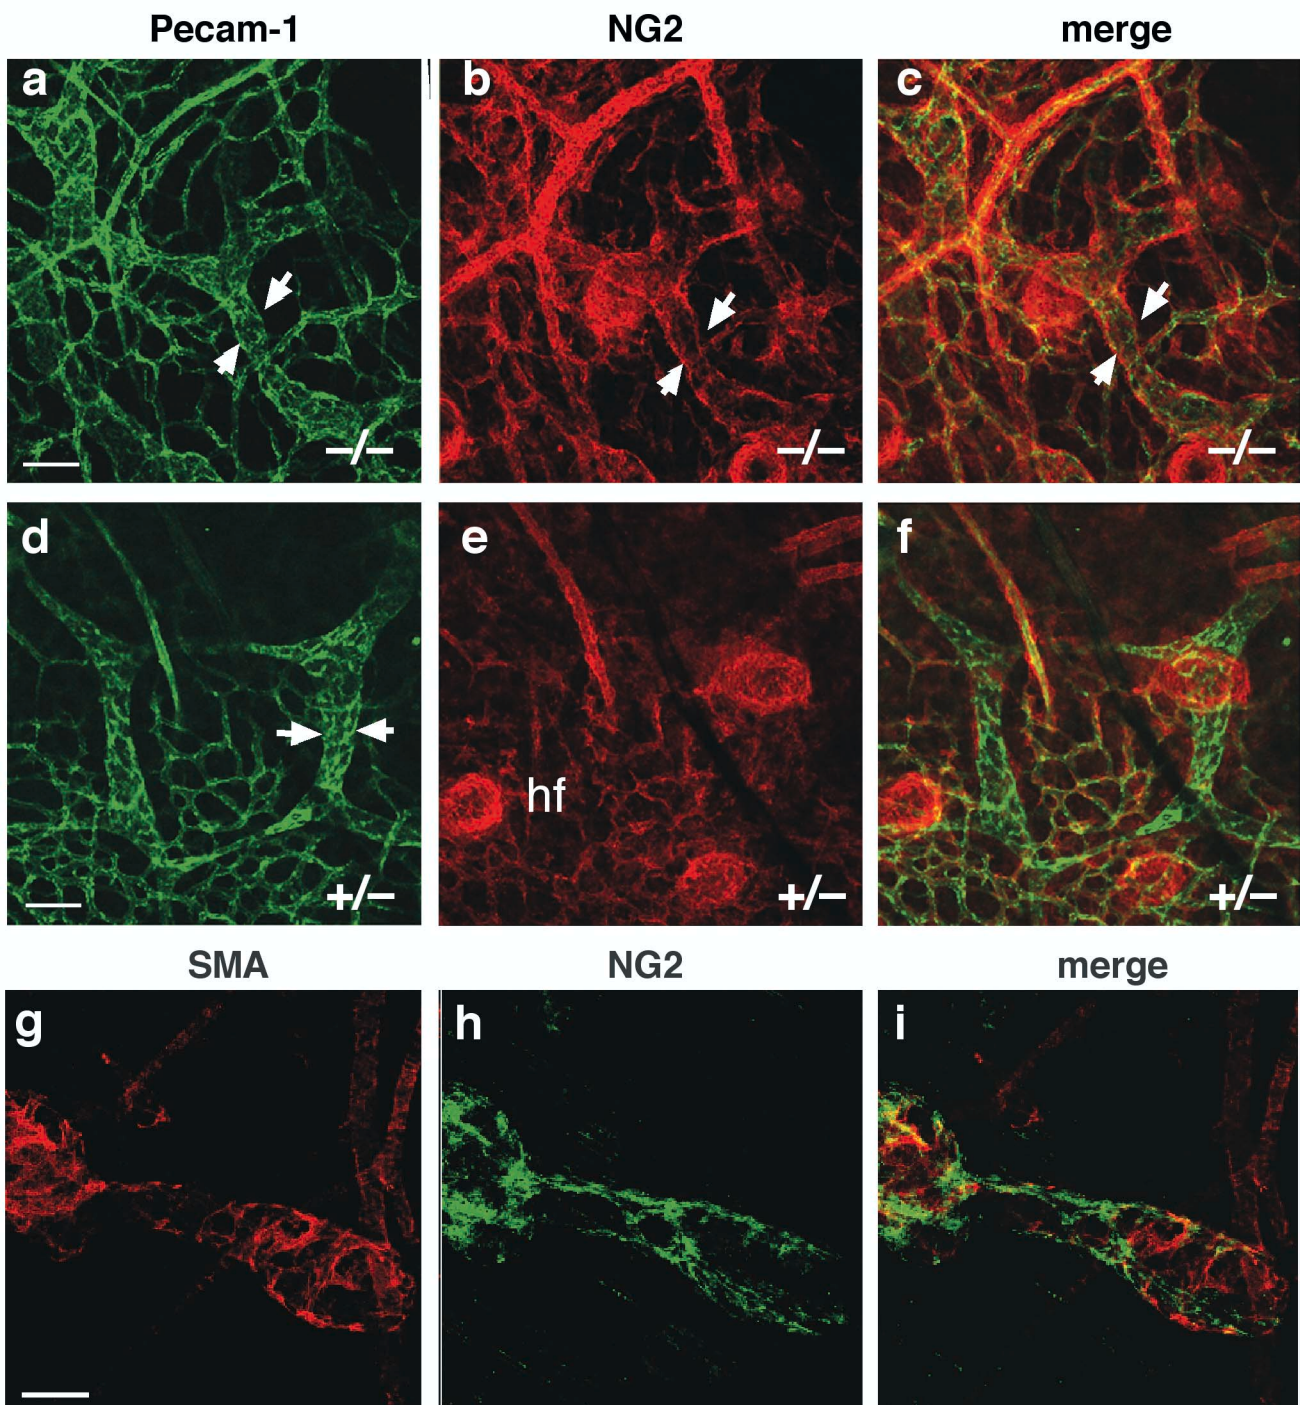

**Supplementary Figure 5. Mural cells associated with lymphatic vessels of *Foxc2*<sup>-/-</sup> mice express the PC marker NG2.** (a-f) Whole mount staining of E17.5 skin for Pecam-1 (green) and NG2 (red). Lymphatic vessels (arrows) can be identified as large vessels with an irregular lumen, forming a honeycomb-like network. hf, hair follicle. (g-i) NG2 and SMA are expressed in partially overlapping populations of lymphatic periendothelial cells only in the *Foxc2*<sup>-/-</sup> mice. Whole mount staining of E17.5 mouse skin from *Foxc2*<sup>-/-</sup> embryos for NG2 (green) and SMA (red). The lymphatics in the *Foxc2*<sup>-/-</sup> embryos are recognized as characteristic irregular large vessels outlined by the SMA positive cells. Bar, 50  $\mu$ m.
