# Supplementary material for: Defective valves and abnormal mural cell recruitment underlie lymphatic vascular failure in lymphedema distichiasis
Source: Springer Nature journal article supplement (doi:10.1038/nm1094), 2004-08-22
Supplement: 41591_2004_BFnm1094_MOESM6_ESM.pdf [file 41591_2004_BFnm1094_MOESM6_ESM.pdf]

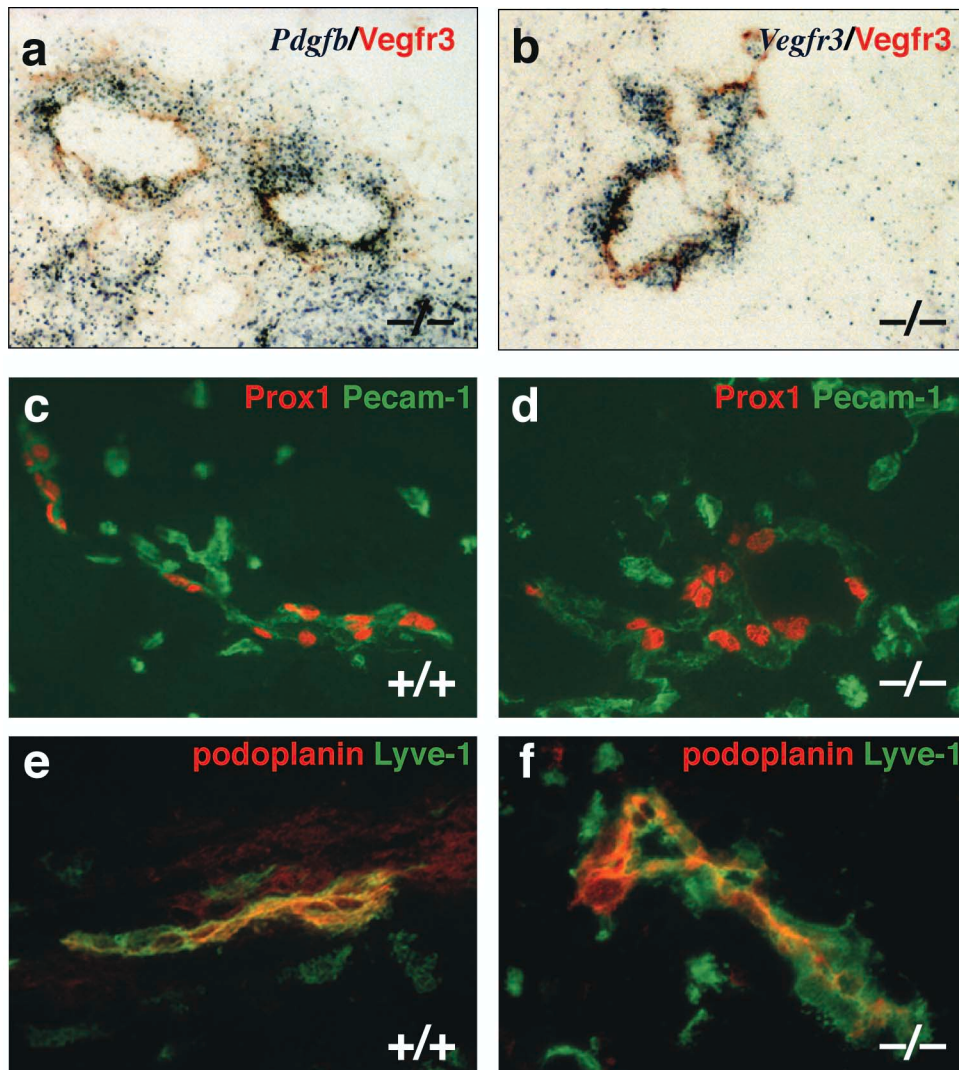

**Supplementary Figure 6. *Pdgfb*, *Vegfr3*, *Prox1* and podoplanin are expressed in lymphatic endothelium lacking *Foxc2*.** (a) Double *Pdgfb* *in situ* hybridization (blue) and *Vegfr3* immunohistochemical staining (brown) show the expression of *Pdgfb* in lymphatic endothelial cells. (b) *Vegfr3* *in situ* hybridization/immunohistochemical staining was used as a positive control. (c-f) Frozen sections from skin of E17.5 *Foxc2*<sup>-/-</sup> and the wt littermates were stained for *Prox1* and *Pecam-1* (c,d) or podoplanin and *Lyve-1* (e,f).
