# Supplementary material for: Defective valves and abnormal mural cell recruitment underlie lymphatic vascular failure in lymphedema distichiasis
Source: Springer Nature journal article supplement (doi:10.1038/nm1094), 2004-08-22
Supplement: 41591_2004_BFnm1094_MOESM7_ESM.pdf [file 41591_2004_BFnm1094_MOESM7_ESM.pdf]

**Supplementary Figure 7. Genetic relationship between *Vegfr3* and *Foxc2*.** (a-b) Normal development of lymphatic vasculature at E12.5 in compound *Foxc2*<sup>+/-</sup>;*Vegfr3*<sup>lacz/lacz</sup> mice. fl-forelimb. Lymphatic vessels are visualized by whole mount staining for  $\beta$ -galactosidase. (c,d) Co-expression of *Vegfr3* (green) and *Foxc2* (red) in the heart endothelium at E9.5 (c), but not in the blood vessels of the head (d). As reported previously, there is strong expression of *Foxc2* in the head mesenchyme. Bar, 50  $\mu$ m. (e,f) Absence of *Foxc2* expression from the heart endocardium of *Vegfr3*<sup>lacz/lacz</sup> embryos at E9.5 (arrows). Whole-mount *in situ* hybridization using the *Foxc2* antisense probe.
