# Supplementary material for: Defective valves and abnormal mural cell recruitment underlie lymphatic vascular failure in lymphedema distichiasis
Source: Springer Nature journal article supplement (doi:10.1038/nm1094), 2004-08-22
Supplement: 41591_2004_BFnm1094_MOESM8_ESM.pdf [file 41591_2004_BFnm1094_MOESM8_ESM.pdf]

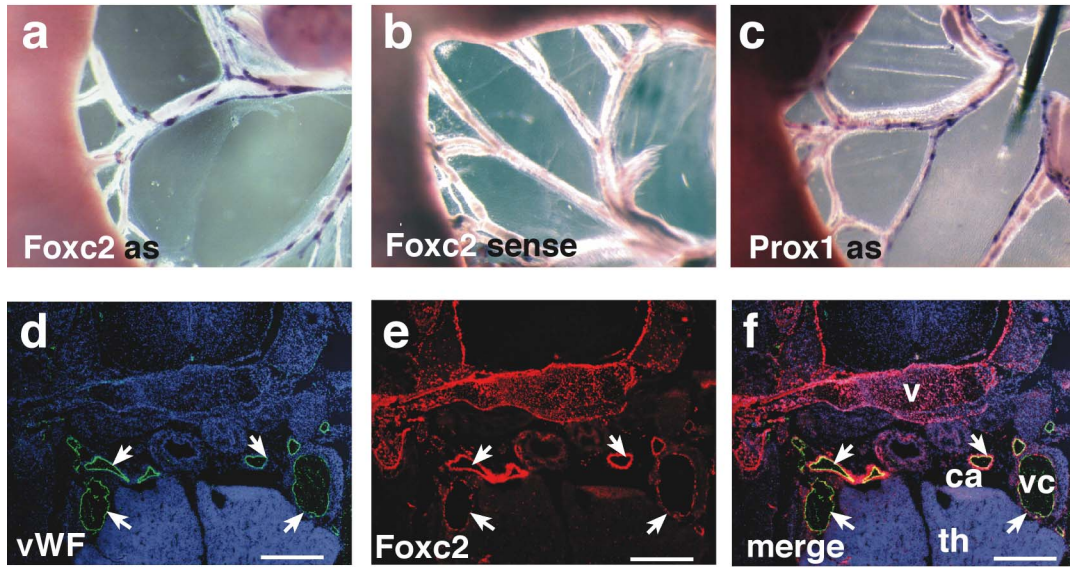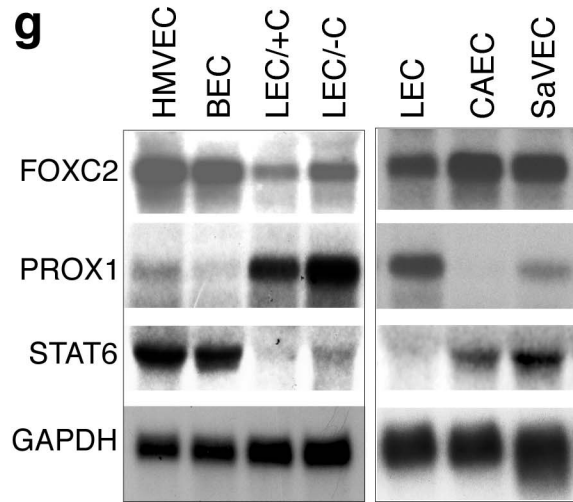

**Supplementary Figure 8. Expression pattern of FOXC2.** (a-c) Expression of *Foxc2* mRNA in mesenteric lymphatic vessels. Whole mount *in situ* hybridization of mesenteric vessels in the wt mice using *Foxc2* and *PROX1* antisense probes (a, c), or control *Foxc2* sense probe (b). (d-f) *Foxc2* (red) is expressed in the large blood vessels at E17.5. Staining for vWF (green) and DNA (blue). ca-carotid artery; vc-vena cava; v-vertebra; th-thymus. Arrows indicate the expression of *Foxc2* in vena cava and carotid artery. Strong expression is also observed in vertebral bodies, as previously reported. Bar, 500  $\mu$ m. (g) Expression of FOXC2 in human primary endothelial cells. Northern blotting and hybridization for the indicated transcripts. Hybridization to PROX1 and STAT6 probes was used to confirm the identity of the lymphatic and blood vascular endothelial cells, respectively<sup>37</sup>, and hybridization to GAPDH probe was used as a loading control. CAEC, coronary artery endothelial cells (ECs); SaVEC, saphenous vein ECs; HDMEC, human dermal microvascular ECs; BEC, blood vascular ECs; LEC, lymphatic ECs. +C,-C: cells cultured in the presence or in the absence of 100 ng/ml of VEGF-C.
