# Supplementary material for: Defective valves and abnormal mural cell recruitment underlie lymphatic vascular failure in lymphedema distichiasis
Source: Springer Nature journal article supplement (doi:10.1038/nm1094), 2004-08-22
Supplement: 41591_2004_BFnm1094_MOESM9_ESM.pdf [file 41591_2004_BFnm1094_MOESM9_ESM.pdf]

**Supplementary Table 1. Use of antibodies against lymphatic endothelial specific markers in different experimental settings.**

| <b>Name</b> | <b>Description</b>            | <b>Staining</b> | <b>Antibodies</b>         | <b>Used for</b>                                                               | <b>Remarks</b>          |
|-------------|-------------------------------|-----------------|---------------------------|-------------------------------------------------------------------------------|-------------------------|
| LYVE-1      | Hyaluronan receptor           | Cell surface    | Rabbit anti-mouse         | Whole mount immunohistochemistry, paraffin sections (PF)                      | Low pH retrieval for PF |
| Podoplanin  | Cell surface mucoprotein      | Cell surface    | Syrian hamster anti-mouse | Paraffin and frozen sections                                                  | Low pH retrieval for PF |
| PROX1       | Homeobox transcription factor | Nuclear         | Rabbit anti-human         | Frozen sections                                                               | -                       |
| VEGFR-3     | Receptor tyrosine kinase      | Cell surface    | Goat anti-mouse           | Immunohistochemistry after <i>in situ</i> hybridization, whole mount staining | -                       |
